# Supplementary material for: Development and characterization of water hyacinth reinforced thermoplastic starch as sustainable biocomposites
Source: Royal Society of Chemistry journal article supplement (doi:10.1039/d4su00803k), 2025-01-01
Supplement: d4su00803k3.pdf [file d4su00803k3.pdf]

## Supplementary File

### Development and characterization of water hyacinth reinforced thermoplastic starch as sustainable biocomposites

Diptiranjan Behera<sup>1</sup>, Shruti S. Pattnaik<sup>1</sup>, Shubhendu S. Patra<sup>1</sup>, Aruna K. Barick<sup>2</sup>, Jyotsnarani Pradhan<sup>3</sup>, and Ajaya K. Behera<sup>1\*</sup>

<sup>1</sup>Department of Chemistry, Utkal University, Bhubaneswar 751004, India

<sup>2</sup>Department of Chemistry, VSSUT, Sambalpur, Odisha 768018, India

<sup>3</sup>Department of Biotechnology, Utkal University, Bhubaneswar 751004, India

#### 1. FESEM analysis TPS-WHF composites

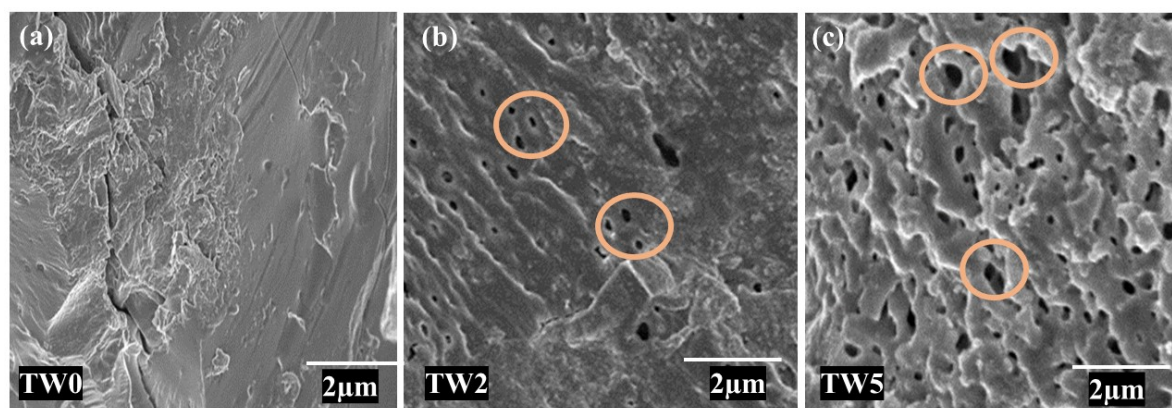

**Fig. S1:** FESEM images of (a) TW0, (b) TW2, and (c) TW5 composites.

The increase in porosity upon the addition of WHF filler can be attributed to factors such as enhanced moisture uptake and biodegradability. These porous structures, however, were also crucial in making the TW composites harder, more brittle, and more impact-resistant compared to the soft and flexible neat TPS (TW0), thereby supporting the manufacturing of single-use utility products. However, further increases in WHF loading led to higher porosity, causing the TW5 composite to perform poorly in terms of comparative mechanical properties.
